# Supplementary material for: Acute Myopericarditis after COVID-19 Vaccine in Teenagers
Source: Case Rep Cardiol. 2021 Sep 20;2021:8268755. doi: 10.1155/2021/8268755 (PMC8476255; doi:10.1155/2021/8268755)
Supplement: Supplementary Materials — CARE Case Report guideline checklist. [file 8268755.f1.pdf]

## CARE Checklist of information to include when writing a case report

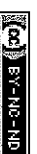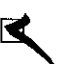

| Topic                                    | Item | Checklist item description                                                                                   | Reported on Line                                                    |
|------------------------------------------|------|--------------------------------------------------------------------------------------------------------------|---------------------------------------------------------------------|
| Key Words<br>Abstract<br>(no references) | 1    | The diagnosis or intervention of primary focus followed by the words "case report" .....                     | Page 1 - line 1                                                     |
|                                          | 2    | 2 to 5 key words that identify diagnoses or interventions in this case report, including "case report" ...   | Page 2 - line 10                                                    |
|                                          | 3a   | Introduction: What is unique about this case and what does it add to the scientific literature? .....        | Page 2 - line 15-20                                                 |
|                                          | 3b   | Main symptoms and/or important clinical findings .....                                                       | Page 3 - lines 3-10                                                 |
| Introduction                             | 3c   | The main diagnoses, therapeutic interventions, and outcomes .....                                            | Page 3 - lines 3-10                                                 |
|                                          | 3d   | Conclusion—What is the main "take-away" lesson(s) from this case? .....                                      | Page 3 - lines 14-20                                                |
|                                          | 4    | One or two paragraphs summarizing why this case is unique (may include references) .....                     | Page 4 - lines 1-25                                                 |
|                                          | 5a   | De-identified patient specific information .....                                                             | Page 5 line 6, Page 6 line 10                                       |
| Patient Information                      | 5b   | Primary concerns and symptoms of the patient .....                                                           | Page 5 - line 9-12                                                  |
|                                          | 5c   | Medical, family, and psycho-social history including relevant genetic information .....                      | N/A                                                                 |
|                                          | 5d   | Relevant past interventions with outcomes .....                                                              | None                                                                |
|                                          | 6    | Describe significant physical examination (PE) and important clinical findings .....                         | Page 5 line 13-17                                                   |
| Clinical Findings                        | 7    | Historical and current information from this episode of care organized as a timeline .....                   | Page 5 2-6                                                          |
|                                          | 8a   | Diagnostic testing (such as PE, laboratory testing, imaging, surveys) .....                                  | Page 5 line 15-25                                                   |
|                                          | 8b   | Diagnostic challenges (such as access to testing, financial, or cultural) .....                              | Page 5 line 23-25                                                   |
|                                          | 8c   | Diagnosis (including other diagnoses considered) .....                                                       | Page 6 line 1-3                                                     |
| Therapeutic Intervention                 | 8d   | Prognosis (such as staging in oncology) where applicable .....                                               | N/A                                                                 |
|                                          | 9a   | Types of therapeutic intervention (such as pharmacologic, surgical, preventive, self-care) .....             | N/A                                                                 |
|                                          | 9b   | Administration of therapeutic intervention (such as dosage, strength, duration) .....                        | N/A                                                                 |
|                                          | 9c   | Changes in therapeutic intervention (with rationale) .....                                                   | N/A                                                                 |
| Follow-up and Outcomes                   | 10a  | Clinician and patient-assessed outcomes (if available) .....                                                 | Page 6 line 5-7                                                     |
|                                          | 10b  | Important follow-up diagnostic and other test results .....                                                  | Page 7 line 2                                                       |
|                                          | 10c  | Intervention adherence and tolerability (How was this assessed?) .....                                       | N/A                                                                 |
|                                          | 10d  | Adverse and unanticipated events .....                                                                       | N/A                                                                 |
| Discussion                               | 11a  | A scientific discussion of the strengths AND limitations associated with this case report .....              | Page 7 line 17-21                                                   |
|                                          | 11b  | Discussion of the relevant medical literature with references .....                                          | Page 7 line 6-16                                                    |
|                                          | 11c  | The scientific rationale for any conclusions (including assessment of possible causes) .....                 | Page 9 line 23-25                                                   |
|                                          | 11d  | The primary "take-away" lessons of this case report (without references) in a one paragraph conclusion ..... | Page 10 line 9-21                                                   |
| Patient Perspective                      | 12   | The patient should share their perspective in one to two paragraphs on the treatment(s) they received .....  | Page 11 line 1-2                                                    |
| Informed Consent                         | 13   | Did the patient give informed consent? Please provide if requested .....                                     | Yes <input checked="" type="checkbox"/> No <input type="checkbox"/> |
